# Supplementary material for: IL-27 induces an IFN-like signature in murine macrophages which in turn modulate colonic epithelium
Source: Frontiers journal article supplement (doi:10.3389/fimmu.2023.1021824), 2023-04-20
Supplement: Image_1.pdf [file Image_1.pdf]

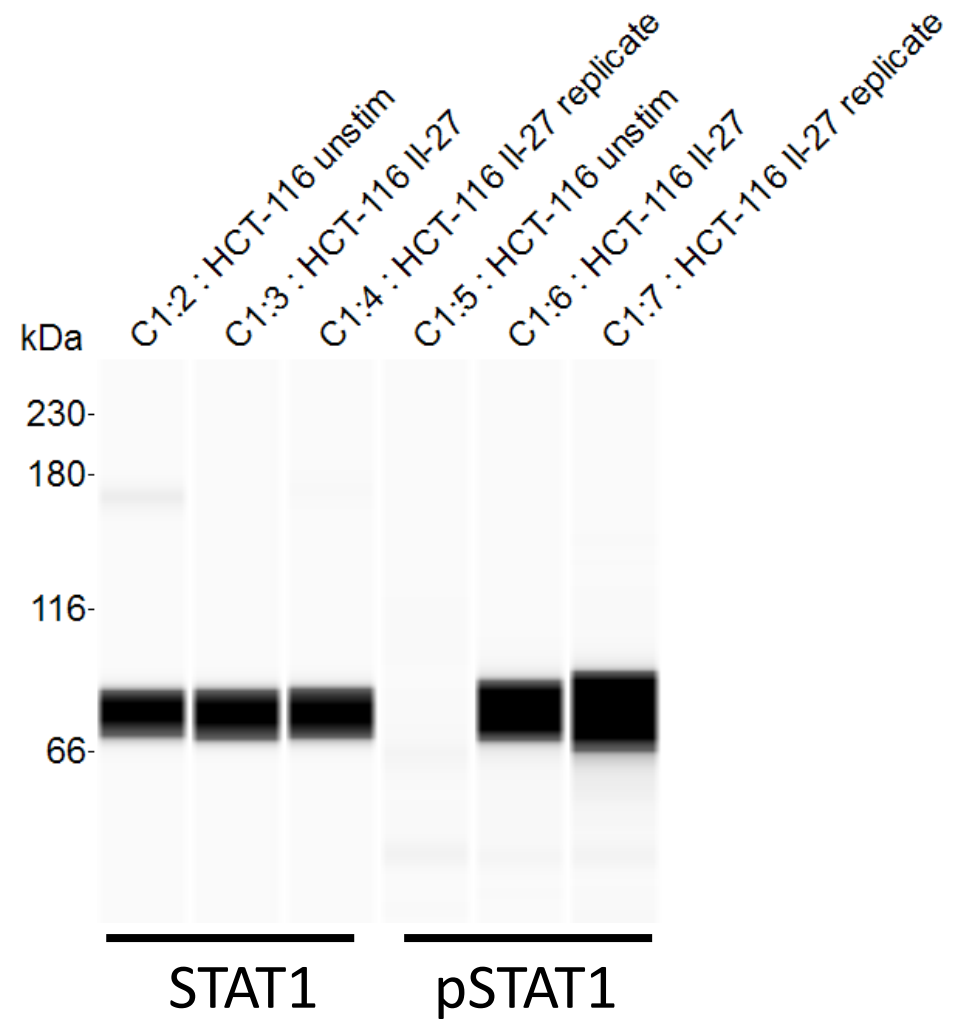

Fig.S1. IL-27 induced phosphorylation of STAT1 in human HCT-116 cells . Bands detected by capillary western blot for STAT1 and pSTAT1. Two experiments are shown.
