# Supplementary material for: IL-27 induces an IFN-like signature in murine macrophages which in turn modulate colonic epithelium
Source: Frontiers journal article supplement (doi:10.3389/fimmu.2023.1021824), 2023-04-20
Supplement: Image_2.pdf [file Image_2.pdf]

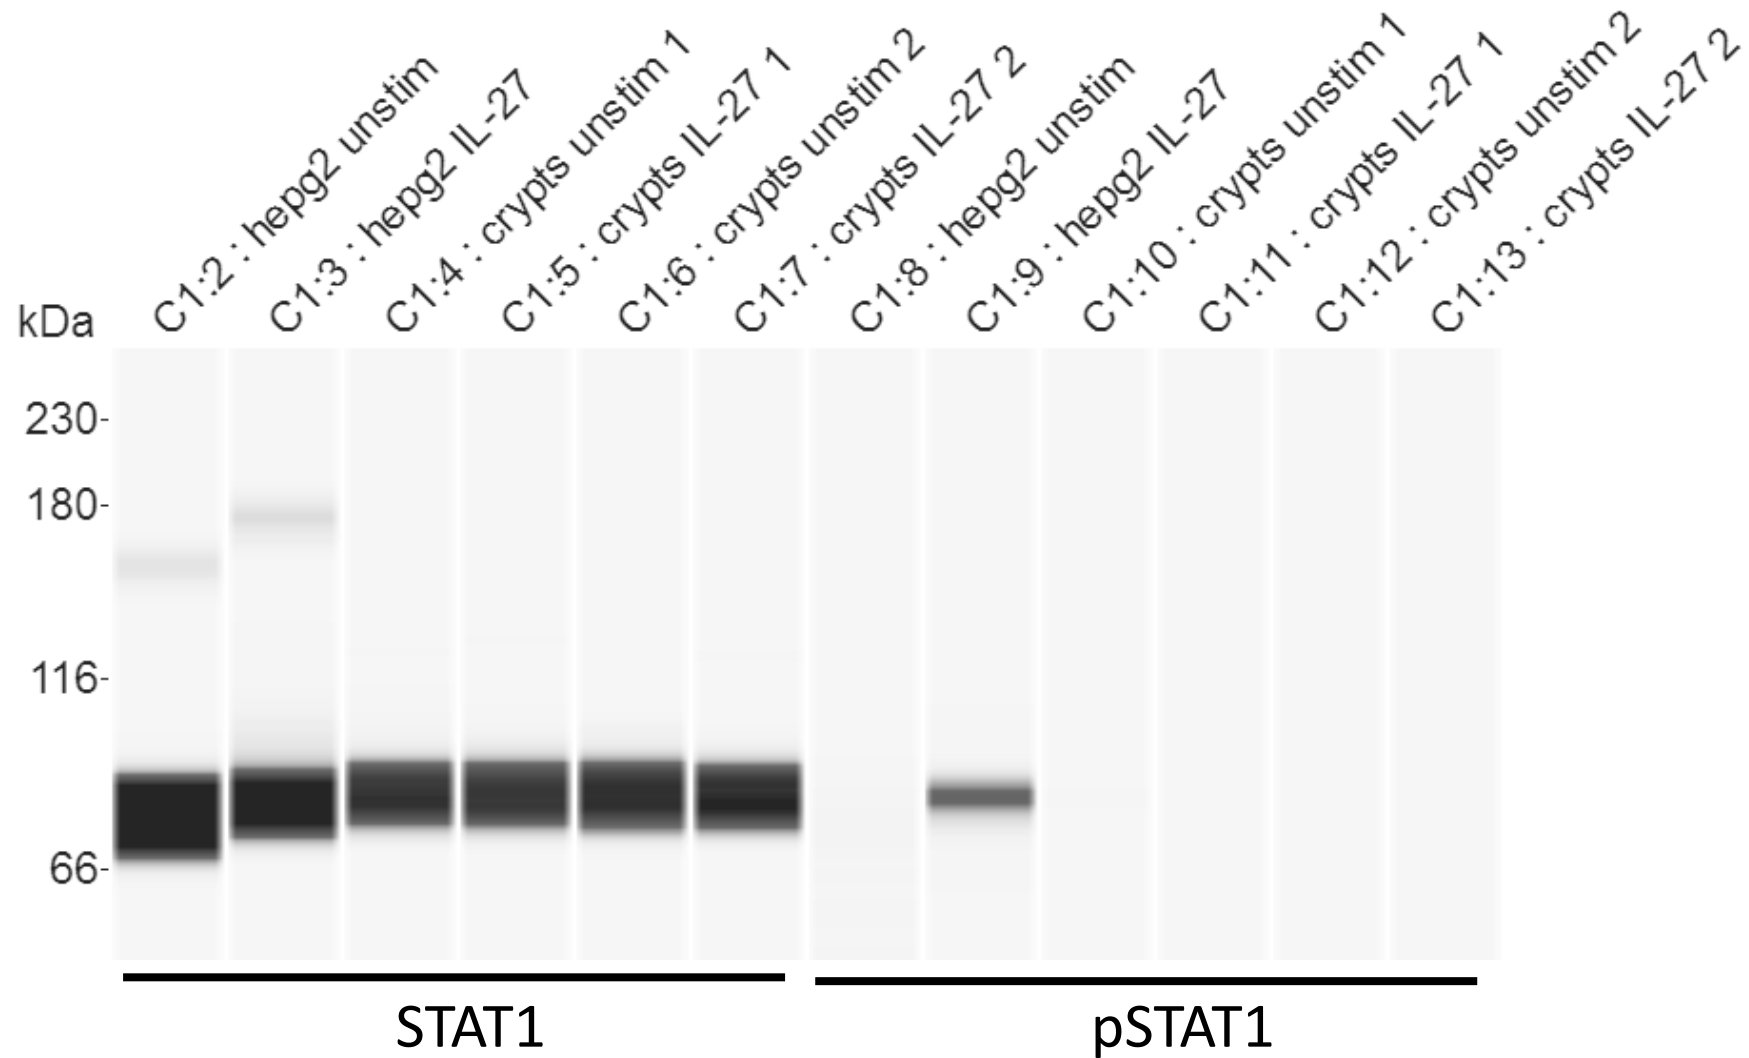

Fig.S2. IL-27 does not induce pSTAT1 in intestinal murine crypts. Freshly isolated intestinal crypts were treated with 100 ng/ml IL-27. HepG2 cells, are shown as a positive control. Capillary western blot was used to detect STAT1 and pSTAT1. Two experiments are shown.
