# Supplementary material for: IL-27 induces an IFN-like signature in murine macrophages which in turn modulate colonic epithelium
Source: Frontiers journal article supplement (doi:10.3389/fimmu.2023.1021824), 2023-04-20
Supplement: Image_3.pdf [file Image_3.pdf]

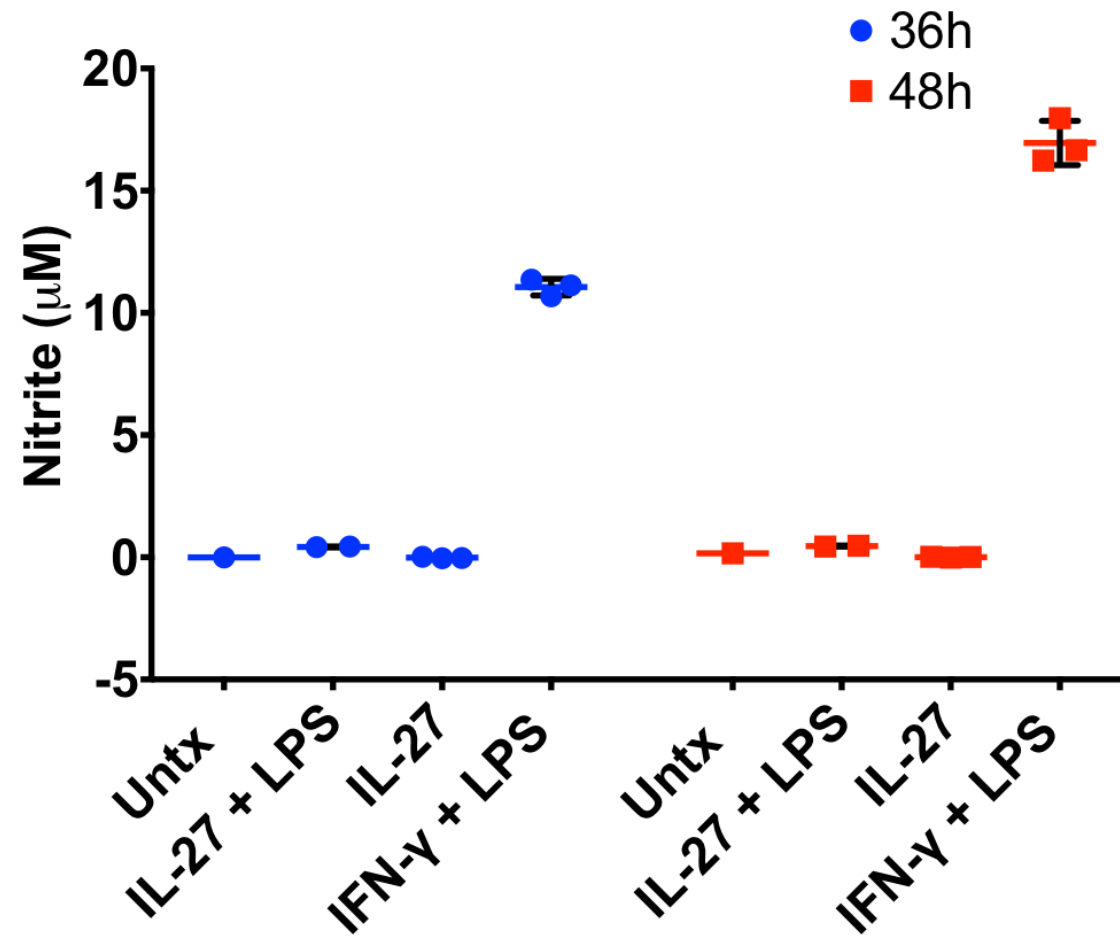

Fig.S3. IL-27 does not induce NO production by murine macrophages. Detection of nitrite was measured as an indicator of nitric oxide production in macrophages activated with IL-27 +/- LPS. IFN-γ + LPS is shown as a positive control. Triplicate measurements are shown at 36 and 48h.
