# Supplementary material for: IL-27 induces an IFN-like signature in murine macrophages which in turn modulate colonic epithelium
Source: Frontiers journal article supplement (doi:10.3389/fimmu.2023.1021824), 2023-04-20
Supplement: Image_4.pdf [file Image_4.pdf]

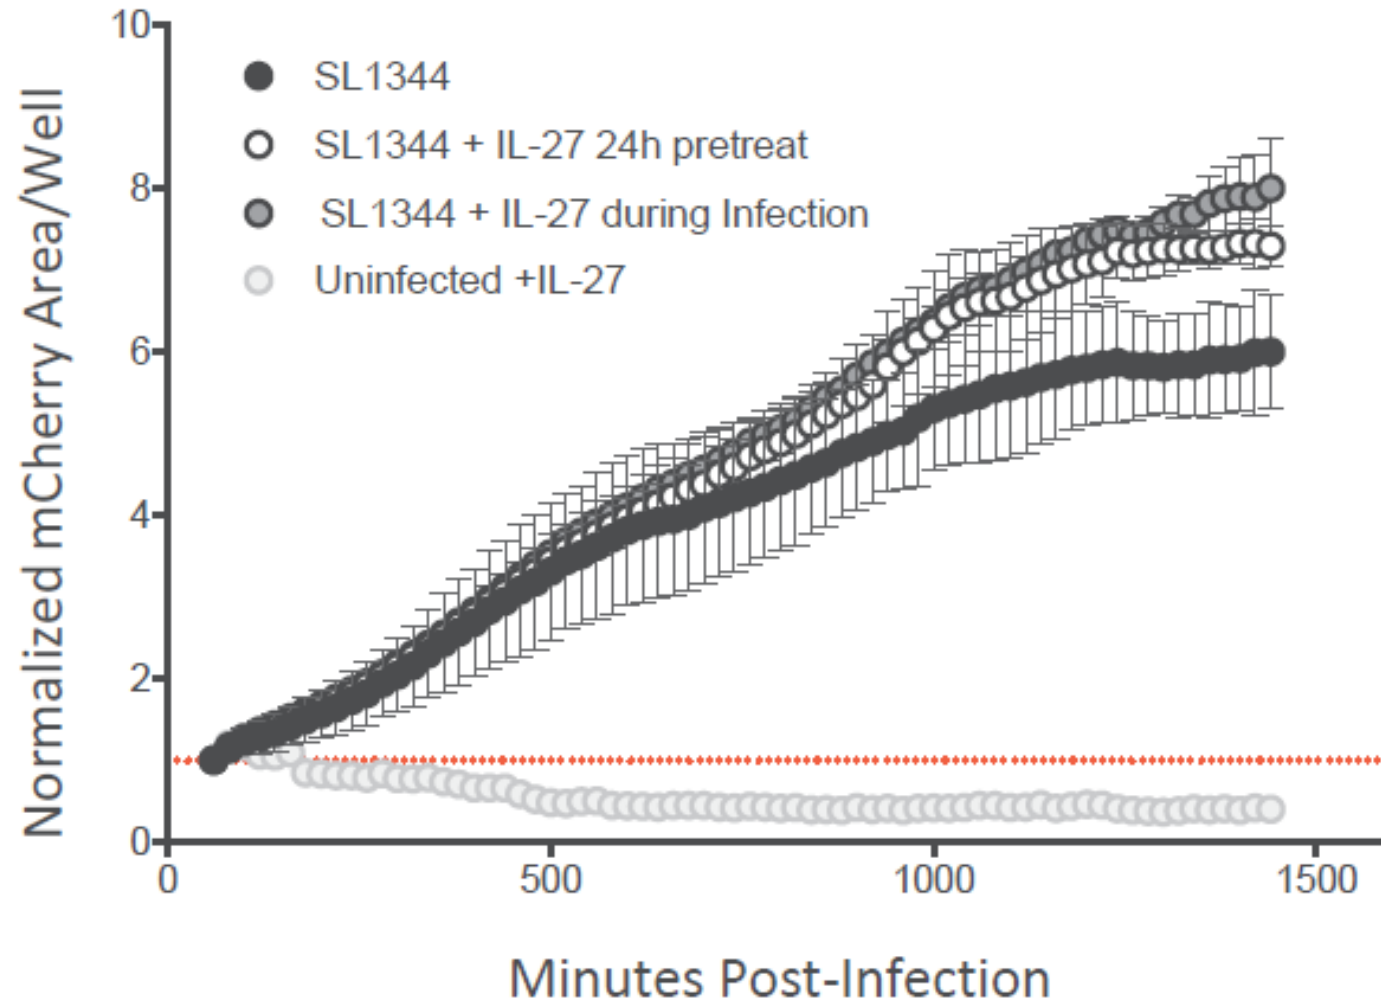

Fig.S4. IL-27 inhibits macrophage clearance of *Salmonella*. Macrophages infected with mCherry-expressing *Salmonella enterica* serovar Typhimurium strain SL1344 +/- treatment with IL-27 24h prior to or at time of infection.
